# Supplementary material for: Genome-wide methylation analysis reveals differentially methylated loci that are associated with an age-dependent increase in bovine fibroblast response to LPS
Source: PubMed Central journal article supplement (PMC5445414; doi:10.1186/s12864-017-3796-1), 2017-05-25

A\_Samples\_v\_B\_Samples CpG top 100

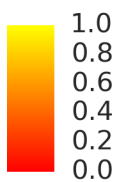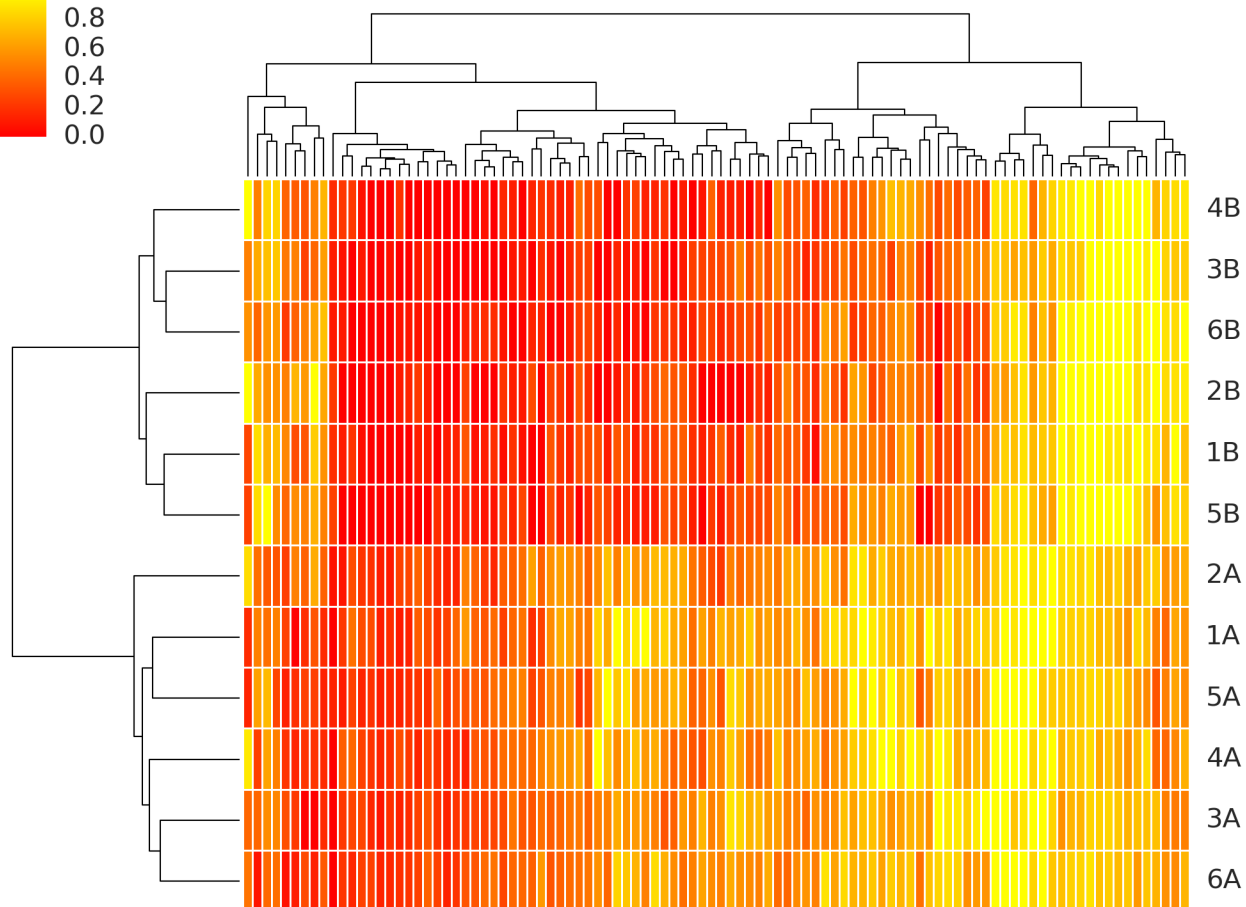

Supplement: 12864_2017_3796_MOESM3_ESM.pdf [file 12864_2017_3796_MOESM3_ESM.pdf]
